# Supplementary material for: Lanthanum-induced synergetic carrier doping of heterojunction to achieve high-efficiency kesterite solar cells
Source: Royal Society of Chemistry journal article supplement (doi:10.1039/d3ta00597f), 2023-01-01
Supplement: d3ta00597f1.pdf [file d3ta00597f1.pdf]

## Supporting Information

### **Lanthanum-induced synergetic carrier doping of heterojunction to achieve high efficiency Kesterite solar cells**

Kang Yin <sup>a,c</sup>, Licheng Lou <sup>a,c</sup>, Jinlin Wang <sup>a,c</sup>, Xiao Xu <sup>a,c</sup>, Jiazheng Zhou <sup>a,c</sup>, Jiangjian Shi <sup>a\*</sup>,

Huijue Wu <sup>a</sup>, Dongmei Li <sup>a,c,d</sup>, Yanhong Luo <sup>a,c,d\*</sup>, Qingbo Meng <sup>a,b,c,d\*</sup>

<sup>a</sup> *Beijing National Laboratory for Condensed Matter Physics, Institute of Physics, Chinese Academy of Sciences, Beijing 100190, P. R. China*

<sup>b</sup> *Center of Materials Science and Optoelectronics Engineering, University of Chinese Academy of Sciences, Beijing 100049, P. R. China*

<sup>c</sup> *School of Physical Sciences University of Chinese Academy of Sciences, Beijing 100049, P. R. China*

<sup>d</sup> *Songshan Lake Materials Laboratory, Dongguan, Guangdong 523808, P. R. China*

*\*Corresponding author.*

*E-mail: shijj@iphy.ac.cn E-mail: yhluo@iphy.ac.cn E-mail: qbmeng@iphy.ac.cn*

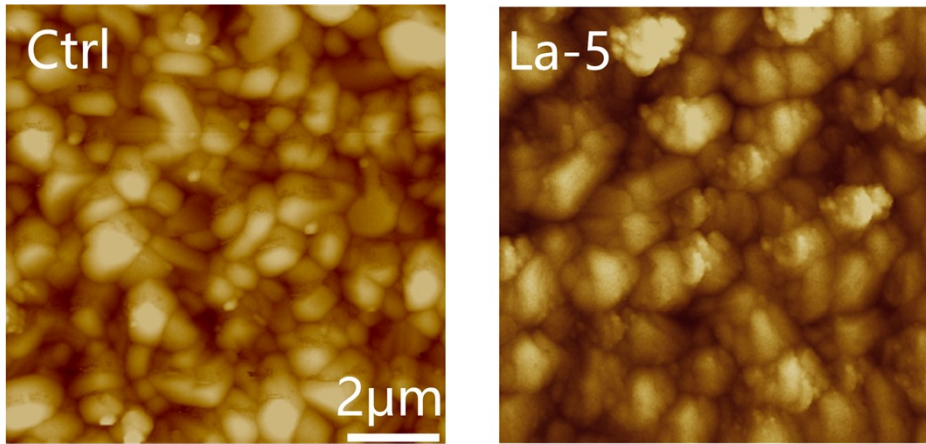

**Fig. S1. AFM images of Ctrl and La-5 films.**

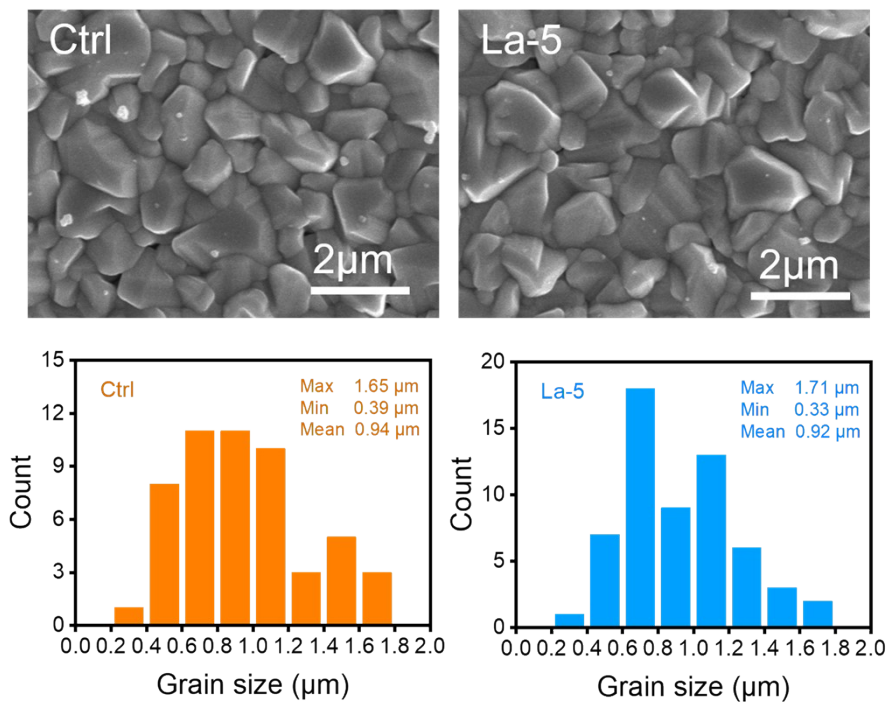

**Fig. S2. SEM images of Ctrl and La-5 films and Grain size distribution of those two films.**

The grain sizes of the Ctrl and La-5 films were mainly 0.6-1.2 microns, and the average sizes were 0.94 and 0.92 microns respectively. This indicates that the grain size does not change significantly after La doping.

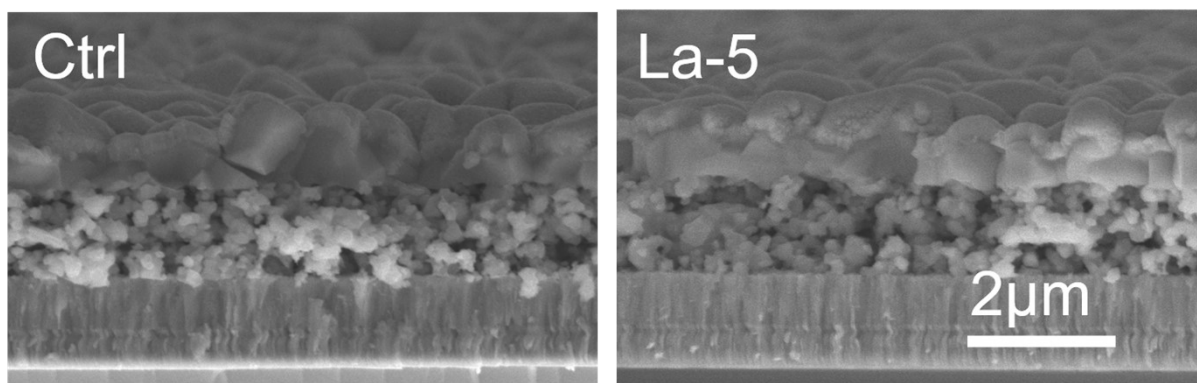

Fig. S3. Cross-sectional-SEM images of Ctrl and La-5 films.

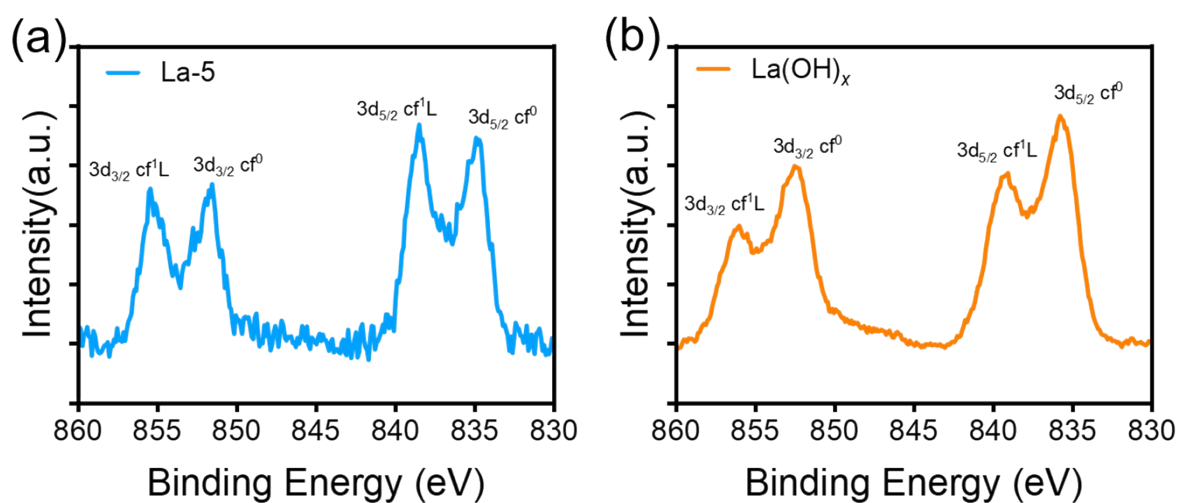

Fig. S4. XPS spectra of La in La-5 film (a) and  $\text{La}(\text{OH})_3$  powder (b). The peaks at 834 ( $3d_{5/2} \text{ cf}^0$ ) and 852 eV ( $3d_{3/2} \text{ cf}^0$ ) are attributed to the corresponding two spin-orbits of  $3d_{5/2}$  and  $3d_{3/2}$ . Further, the peaks at 837 ( $3d_{5/2} \text{ cf}^1\text{L}$ ) and 856 eV ( $3d_{3/2} \text{ cf}^1\text{L}$ ) can be attributed to the satellite peaks of  $3d_{5/2}$  and  $3d_{3/2}$  spin-orbits, respectively. According to reported results, for  $\text{La}(\text{OH})_x$  the ratio of intensity of XPS peaks of La 3d and their satellite peaks  $f^0/f^1$  is greater than 1, but for  $\text{La}_2\text{S}_3$  the ratio  $f^0/f^1$  is less than 1.<sup>1-4</sup> It could be clearly seen that the  $f^0/f^1$  of  $\text{La}(\text{OH})_x$  is greater than 1 in Fig. S4b. However, for La-5 film, the  $f^0/f^1$  is slightly less than 1. This indicates that part of La possibly diffused from  $\text{La}(\text{OH})_x$  layer to CdS layer and substitute the Cd position in the CdS to form La-S bond.

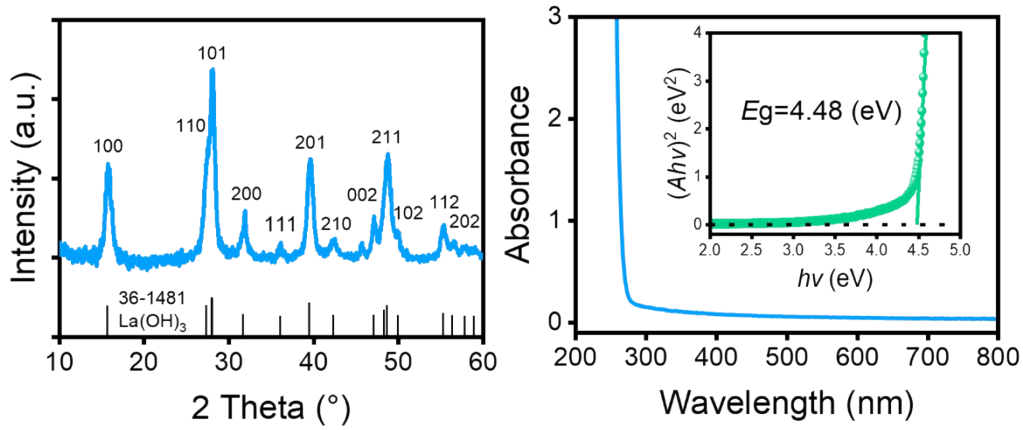

**Fig. S5.** XRD pattern and UV-Vis absorption spectrum of  $\text{La(OH)}_3$  powder obtained from mixing  $\text{LaCl}_3$  and  $\text{NaOH}$  solutions.

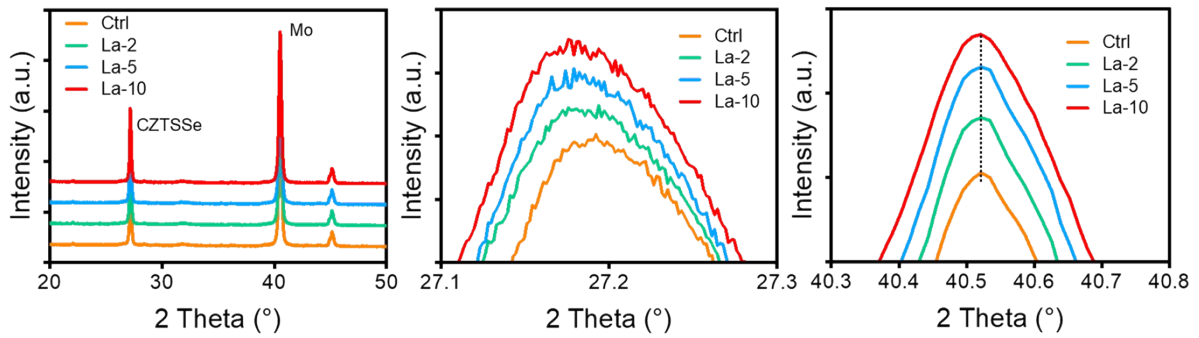

**Fig. S6.** XRD patterns of control, La-2, La-5 and La-10 films.

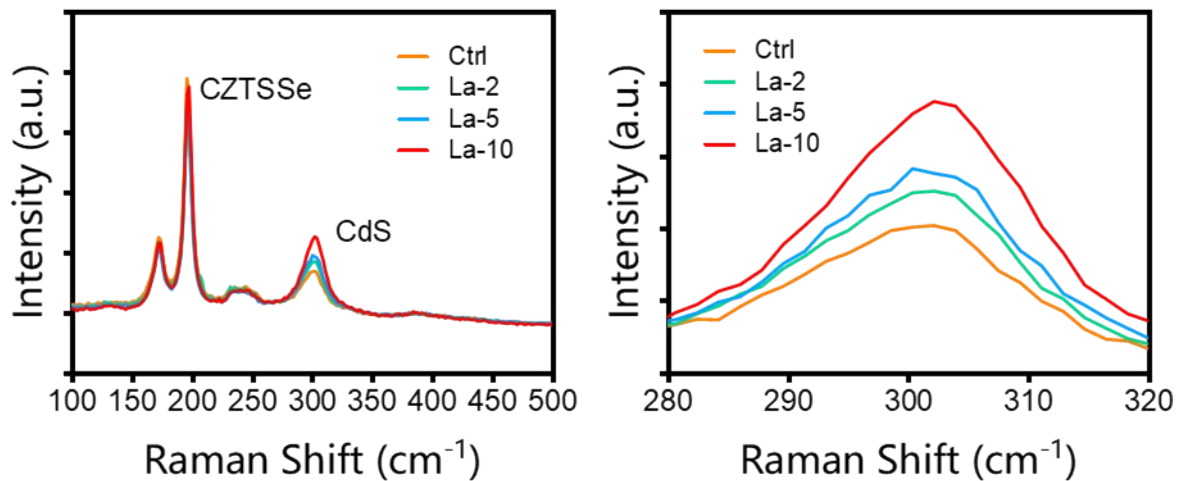

**Fig. S7.** Raman patterns of control, La-2, La-5 and La-10 films.

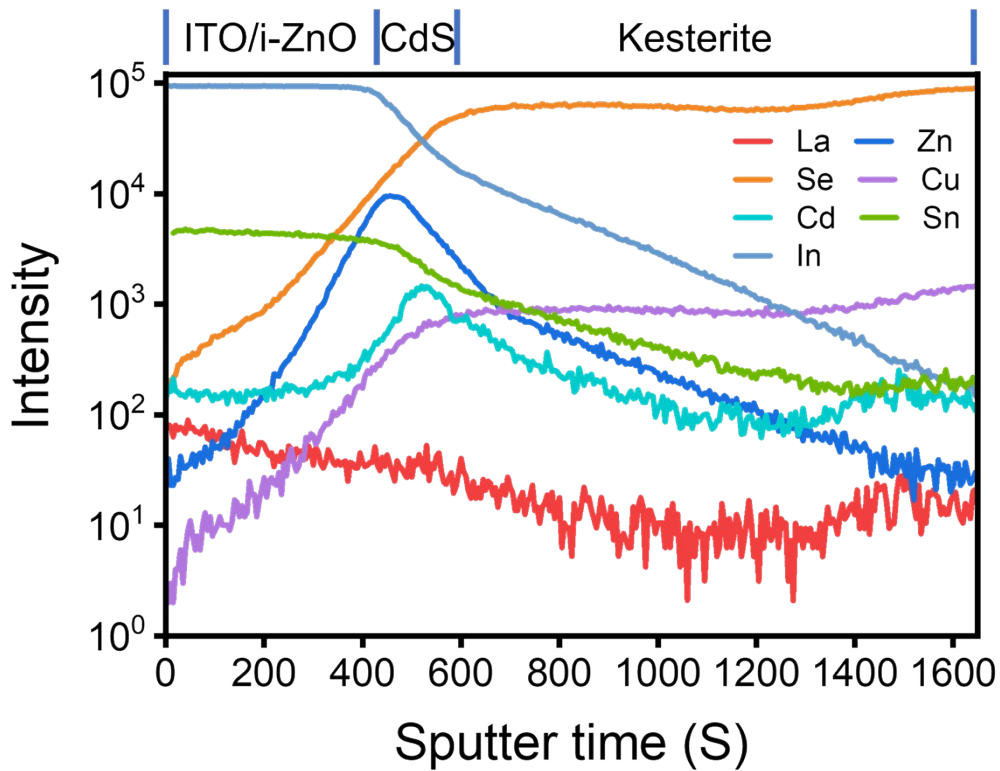

Fig. S8. ToF-SIMS spectra of La-5 devices.

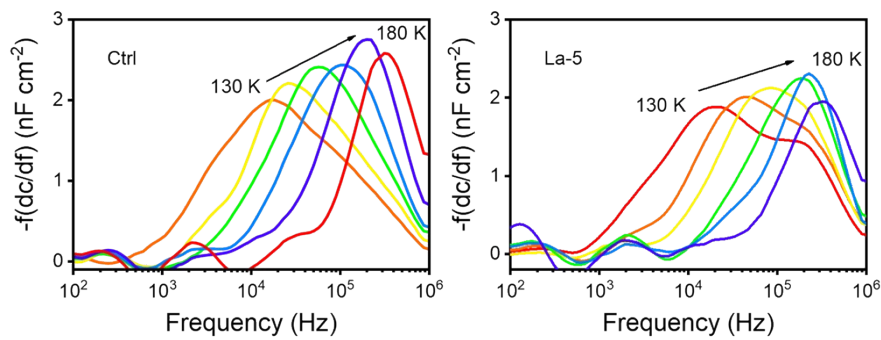

Fig. S9.  $f$  vs  $-f(dC/df)$  plot from C-f-T spectra of Ctrl and La-5 devices.

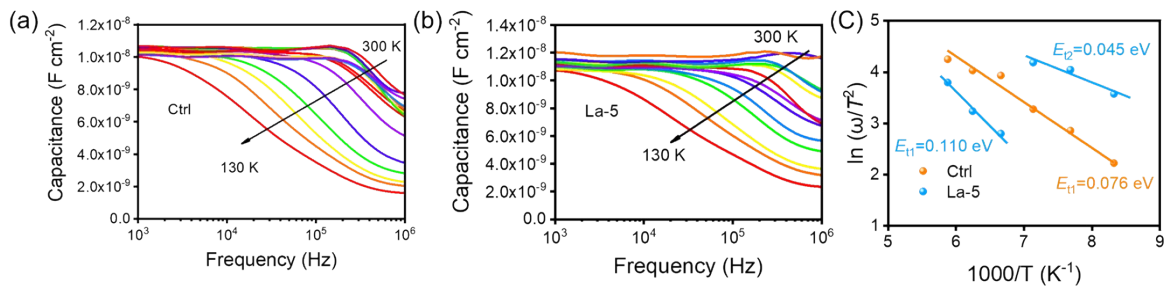

Fig. S10. C-f-T spectra of Ctrl and La-5 device and Arrhenius plots for control and La-5 samples obtained from thermal admittance spectra.

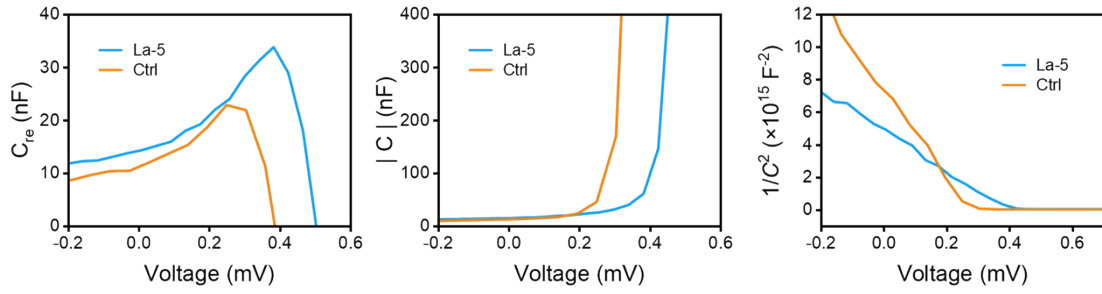

**Fig. S11. C-V curves and Mott-Schottky plot Ctrl and La-5 films.**

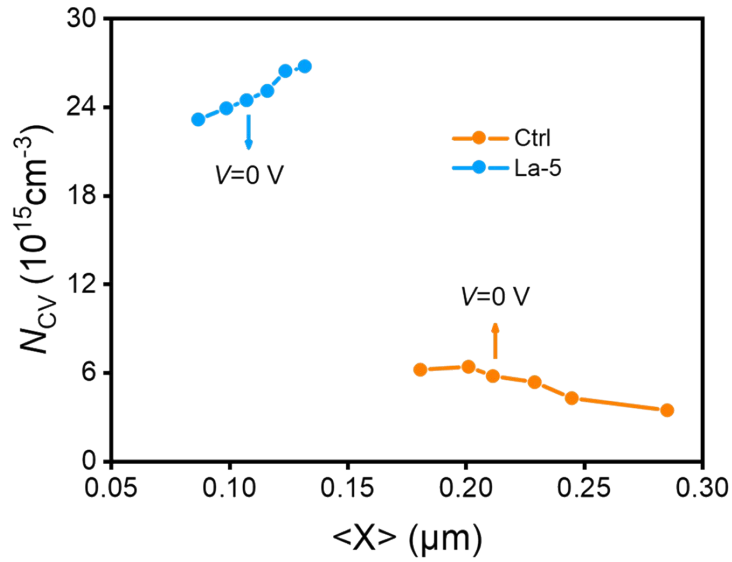

**Fig S12. C-V profile of Ctrl and La-5 cells at 100 kHz.**

**Table S1. Material parameters of different layers for SCAPS-1D simulation.<sup>5-7</sup>**

| Parameters                           | ACZTSSe             | CdS                 | CZTSSe/CdS interface | ZnO               |
|--------------------------------------|---------------------|---------------------|----------------------|-------------------|
| Thickness ( $\mu\text{m}$ )          | 1.2                 | 0.05                | --                   | 0.025             |
| Bandgap (eV)                         | 1.1                 | 2.45                | --                   | 3.4               |
| Electron affinity (eV)               | 4.1                 | 3.7                 | --                   | 4.15              |
| Dielectric permittivity (relative)   | 7                   | 10                  | --                   | 10                |
| CB effective DOS ( $1/\text{cm}^3$ ) | $2.2 \cdot 10^{18}$ | $1 \cdot 10^{19}$   | --                   | $1 \cdot 10^{21}$ |
| VB effective DOS ( $1/\text{cm}^3$ ) | $1.8 \cdot 10^{19}$ | $1.5 \cdot 10^{19}$ | --                   | $9 \cdot 10^{18}$ |
| Electron thermal velocity (cm/s)     | $1 \cdot 10^7$      | $1 \cdot 10^7$      | --                   | $1 \cdot 10^7$    |

|                                                 |                                                                                                                                                        |                                                          |                                                                                                                                   |                                                                         |
|-------------------------------------------------|--------------------------------------------------------------------------------------------------------------------------------------------------------|----------------------------------------------------------|-----------------------------------------------------------------------------------------------------------------------------------|-------------------------------------------------------------------------|
| Hole thermal velocity (cm/s)                    | $1 \cdot 10^7$                                                                                                                                         | $1 \cdot 10^7$                                           | --                                                                                                                                | $1 \cdot 10^7$                                                          |
| Electron mobility ( $\text{cm}^2/\text{Vs}$ )   | 50                                                                                                                                                     | 50                                                       | --                                                                                                                                | $5 \cdot 10^{-4}$                                                       |
| Holt mobility ( $\text{cm}^2/\text{Vs}$ )       | 1                                                                                                                                                      | 20                                                       | --                                                                                                                                | 10                                                                      |
| Shallow donor density ND ( $1/\text{cm}^3$ )    | 1                                                                                                                                                      | $5 \cdot 10^{17}$ for Ctrl<br>$2 \cdot 10^{18}$ for La-5 | --                                                                                                                                | $1 \cdot 10^{19}$                                                       |
| Shallow acceptor density ND ( $1/\text{cm}^3$ ) | $3 \cdot 10^{15}$ for Ctrl<br>$1 \cdot 10^{16}$ for La-5                                                                                               | 1                                                        | --                                                                                                                                | 1                                                                       |
| Defects                                         | Single acceptor<br>0.2 eV above $E_V$<br>$6 \cdot 10^{15} \text{ cm}^{-2}$<br>Single donor<br>0.3 eV blow $E_C$<br>$1.5 \cdot 10^{15} \text{ cm}^{-2}$ | --                                                       | Single acceptor<br>0.3 eV above $E_V$<br>$9 \cdot 10^{11} \text{ cm}^{-2}$ for Ctrl<br>$2 \cdot 10^{11} \text{ cm}^{-2}$ for La-5 | Single donor<br>0.6 eV above $E_V$<br>$1 \cdot 10^{14} \text{ cm}^{-2}$ |

| Parameters                                                  | MoSe2               | Back contact                     | Front contact                    | ITO                                                                     |
|-------------------------------------------------------------|---------------------|----------------------------------|----------------------------------|-------------------------------------------------------------------------|
| Thickness ( $\mu\text{m}$ )                                 | 0.6                 | --                               | --                               | 0.2                                                                     |
| Bandgap (eV)                                                | 1.16                | --                               | --                               | 3.8                                                                     |
| Electron affinity (eV)                                      | 4.3                 | --                               | --                               | 4.6                                                                     |
| Dielectric permittivity (relative)                          | 9                   | --                               | --                               | 10                                                                      |
| CB effective DOS ( $1/\text{cm}^3$ )                        | $2.2 \cdot 10^{18}$ | --                               | --                               | $4 \cdot 10^{18}$                                                       |
| VB effective DOS ( $1/\text{cm}^3$ )                        | $1.8 \cdot 10^{19}$ | --                               | --                               | $9 \cdot 10^{18}$                                                       |
| Electron thermal velocity (cm/s)                            | $1 \cdot 10^7$      | --                               | --                               | $1 \cdot 10^7$                                                          |
| Hole thermal velocity (cm/s)                                | $1 \cdot 10^7$      | --                               | --                               | $1 \cdot 10^7$                                                          |
| Electron mobility ( $\text{cm}^2/\text{Vs}$ )               | 50                  | --                               | --                               | 50                                                                      |
| Holt mobility ( $\text{cm}^2/\text{Vs}$ )                   | 20                  | --                               | --                               | 20                                                                      |
| Shallow donor density ND ( $1/\text{cm}^3$ )                | 1                   | --                               | --                               | $1 \cdot 10^{21}$                                                       |
| Shallow acceptor density ND ( $1/\text{cm}^3$ )             | $3 \cdot 10^{16}$   | --                               | --                               | 1                                                                       |
| Thermionic emission / surface recombination velocity (cm/s) |                     | Electrons $10^5$<br>Holes $10^7$ | Electrons $10^7$<br>Holes $10^5$ | Single donor<br>0.6 eV above $E_V$<br>$1 \cdot 10^{14} \text{ cm}^{-2}$ |

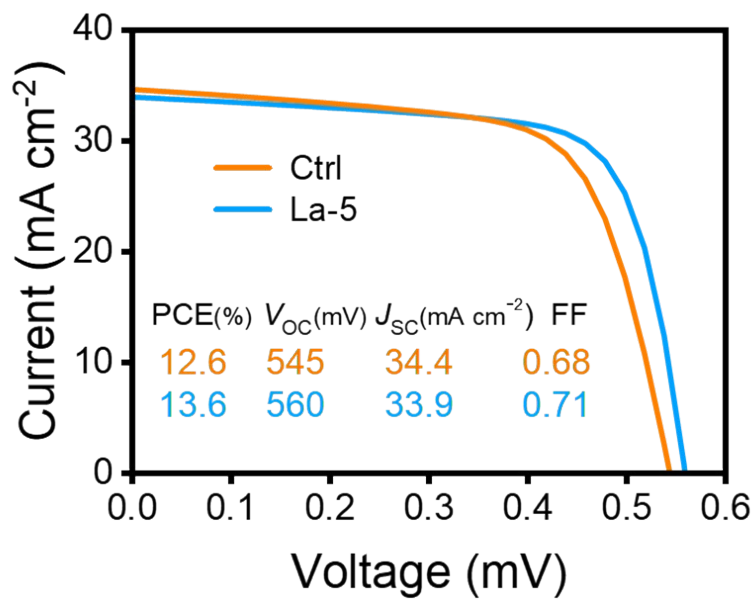

**Fig. S13. Simulated  $J$ - $V$  curves by SCPAS with the parameters in table S1.**



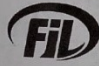

检测结果/说明:  
Results of Test and additional explanation.

1 标准测试条件 STC Standard Test Condition (STC):

总辐照度 Total Irradiance: 1000 W/m<sup>2</sup>

被测电池温度 Temperature: 25.0 °C

光谱分布 Spectral Distribution: AM1.5G

2 STC 条件下测量数据

Measurement Data under STC

正扫 Forward Scan

| 测试次数 Test Times   | $I_{sc}$ (mA) | $V_{oc}$ (V) | $I_{MPP}$ (mA) | $V_{MPP}$ (V) | $P_{MPP}$ (mW) | FF (%) | $\eta$ (%) |
|-------------------|---------------|--------------|----------------|---------------|----------------|--------|------------|
| 1                 | 10.12         | 0.5494       | 9.017          | 0.4281        | 3.860          | 69.43  | 13.63      |
| 2                 | 10.11         | 0.5424       | 8.974          | 0.4236        | 3.801          | 69.31  | 13.42      |
| 3                 | 10.10         | 0.5419       | 8.967          | 0.4200        | 3.766          | 68.81  | 13.30      |
| 平均值 Average Value | 10.11         | 0.5446       | 8.986          | 0.4239        | 3.809          | 69.18  | 13.45      |

反扫 Reverse Scan

| 测试次数 Test Times   | $I_{sc}$ (mA) | $V_{oc}$ (V) | $I_{MPP}$ (mA) | $V_{MPP}$ (V) | $P_{MPP}$ (mW) | FF (%) | $\eta$ (%) |
|-------------------|---------------|--------------|----------------|---------------|----------------|--------|------------|
| 1                 | 10.12         | 0.5480       | 8.900          | 0.4320        | 3.845          | 69.33  | 13.58      |
| 2                 | 10.12         | 0.5473       | 8.904          | 0.4308        | 3.836          | 69.26  | 13.55      |
| 3                 | 10.11         | 0.5471       | 8.899          | 0.4280        | 3.809          | 68.86  | 13.45      |
| 平均值 Average Value | 10.12         | 0.5475       | 8.901          | 0.4303        | 3.830          | 69.15  | 13.53      |

失配因子 Mismatch factor: 1.010

3 STC 下电流-电压特性曲线和功率-电压特性曲线

I-V & P-V Characteristic Curves under STC

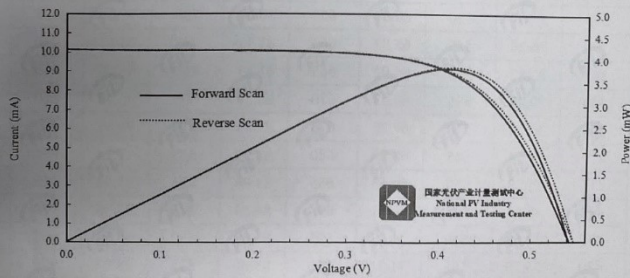

图 1 STC 下电流-电压特性曲线和功率-电压特性曲线  
Figure 1. I-V and P-V characteristic curves of the measured sample under STC

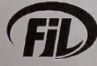

检测结果/说明:

Results of Test and additional explanation

6 样品信息

Pictures of the Measured Sample

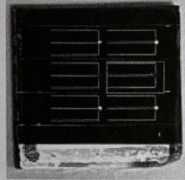

图3 被测样品的正面图像  
Figure 3. Obverse side of the measured sample

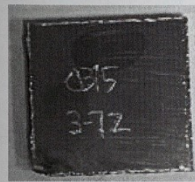

图4 被测样品的反面图像  
Figure 4. Reverse side of the measured sample

测量结果的不确定度为 (Uncertainty of measurement results):

短路电流 (Short-Circuit Current):  $U_{rel}=1.4\%$  ( $k=2$ );

开路电压 (Open-Circuit Voltage):  $U_{rel}=1.0\%$  ( $k=2$ );

最大功率 (Maximum Power):  $U_{rel}=2.2\%$  ( $k=2$ );

转换效率 (Efficiency):  $U_{rel}=2.2\%$  ( $k=2$ );

填充因子 (Fill Factor):  $U_{rel}=3.2\%$  ( $k=2$ );

相对光谱响应 (Relative Spectral Responsivity):

(300-400) nm:  $U_{rel} = 2.2\%$  ( $k=2$ );

(400-1100) nm:  $U_{rel} = 1.8\%$  ( $k=2$ );

(1100-1300) nm:  $U_{rel} = 2.6\%$  ( $k=2$ ).

说明: 该样品的面积为  $0.2832 \text{ cm}^2$ 。(The aperture area of the measured sample was  $0.2832 \text{ cm}^2$ .)

Explanation

检测报告续页专用  
Continued page of test report

科学  
骑缝

Fig. S14. Certified test report of the champion CZTSSe solar cell by National PV Industry Measurement and Testing Center (NPVM).

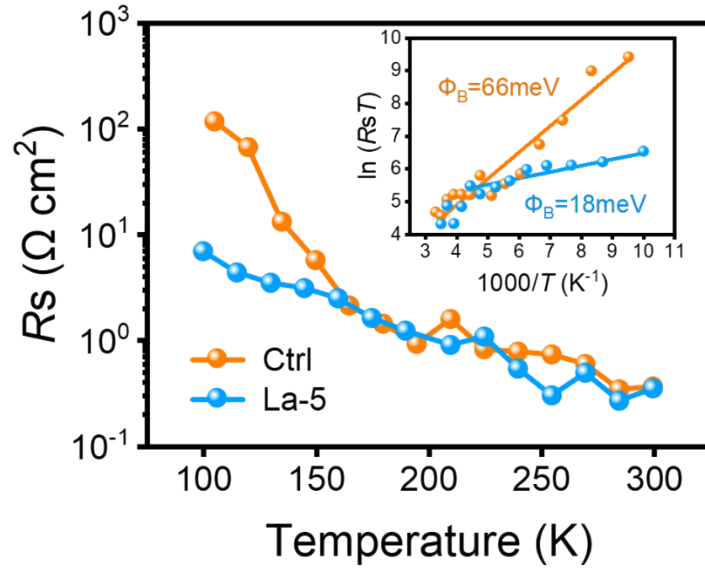

**Figure S15. Temperature- dependence Series resistance (Inset:  $\ln(R_s T)$  vs  $1000/T$  plot) variation of control and La-5 cells. The relative lower carrier barrier potential  $\Phi_B$  of La-5 cell is consistent of the proper energy band alignment simulated by SCAPS-1D shown in figure 4d.**

1. M. F. Sunding, K. Hadidi, S. Diplas, O. M. Løvvik, T. E. Norby and A. E. Gunnæs, *Journal of Electron Spectroscopy and Related Phenomena*, 2011, **184**, 399-409.
2. V. J. Mane, S. B. Kale, S. B. Ubale, V. C. Lokhande, U. M. Patil and C. D. Lokhande, *Journal of Solid State Electrochemistry*, 2021, **25**, 1775-1788.
3. B. Butkus, M. Havel, A. Kostogiannes, A. Howe, M. Kang, R. Gaume, K. A. Richardson and P. Banerjee, *Surface Science Spectra*, 2023, **30**.
4. S. R. Sanivarapu, J. B. Lawrence and G. Sreedhar, *ACS Omega*, 2018, **3**, 6267-6278.
5. J. Li, J. Huang, Y. Huang, H. Tampo, T. Sakurai, C. Chen, K. Sun, C. Yan, X. Cui, Y. Mai and X. Hao, *Solar RRL*, 2021, **5**, 2100418.
6. A. Kumar and A. D. Thakur, *Current Applied Physics*, 2019, **19**, 1111-1119.
7. S. Tripathi, Sadanand, P. Lohia and D. K. Dwivedi, *Sol Energy*, 2020, **204**, 748-760.
